# Supplementary material for: Crystal structures and phase transition behaviour in the 5d transition metal oxides AReO4 (A = Ag, Na, K, Rb, Cs and Tl)
Source: Royal Society of Chemistry journal article supplement (doi:10.1039/c9dt04021h), 2019-01-01
Supplement: c9dt04021h1.pdf [file c9dt04021h1.pdf]

## Electronic Supplementary Information

### Crystal Structures and Phase Transition Behaviour in the 5d transition metal oxides

#### $A\text{ReO}_4$ ( $A = \text{Ag, Na, K, Rb, Cs}$ and $\text{Tl}$ ).

Clarissa Chay<sup>1</sup>, Maxim Avdeev<sup>1,2</sup>, Helen E.A. Brand<sup>3</sup>, Sean Injac<sup>1</sup>, Thomas A. Whittle<sup>1</sup> and  
Brendan J. Kennedy<sup>1\*</sup>

<sup>1</sup> *School of Chemistry, The University of Sydney, Sydney, New South Wales 2006, Australia*

<sup>2</sup> *Australian Centre for Neutron Scattering, Australian Nuclear Science and Technology Organisation, ANSTO, Lucas Heights, NSW 2234, Australia*

<sup>3</sup> *Australian Synchrotron, Australian Nuclear Science and Technology Organisation, ANSTO, 800 Blackburn Road, Clayton, Victoria 3168, Australia*

Table S1: Atomic coordinates and ADPs derived from Rietveld refinements against neutron diffraction data for the  $A\text{ReO}_4$  oxides. The temperatures used for  $\text{TlReO}_4$  are indicated; all other data were measured for the samples at room temperature.

| Sample                         | Atom                                                                                                           | x         | y             | z             | $U_{\text{iso}} / \text{\AA}^2$ |
|--------------------------------|----------------------------------------------------------------------------------------------------------------|-----------|---------------|---------------|---------------------------------|
| <b>NaReO<sub>4</sub></b>       | $a = 5.3725(1) \text{ c} = 11.7412(4) \text{ \AA} \text{ Vol} = 338.90(2) \text{ \AA}^3$                       |           |               |               |                                 |
| $I4_1/a$ (No. 88)              | Na                                                                                                             | 0         | $\frac{1}{4}$ | $\frac{5}{8}$ | 0.0344(11)                      |
| $\chi^2 = 5.905$               | Re                                                                                                             | 0         | $\frac{1}{4}$ | $\frac{1}{8}$ | 0.0081(3)                       |
| $R_p$ 0.0798 $R_{wp}$ 0.0596   | O                                                                                                              | 0.1274(3) | 0.0154(3)     | 0.2076(1)     | 0.0209(3)                       |
| <b>AgReO<sub>4</sub></b>       | $a = 5.37674(7) \text{ c} = 11.8006(2) \text{ \AA} \text{ Vol} = 341.15(1) \text{ \AA}^3$                      |           |               |               |                                 |
| $I4_1/a$ (No. 88)              | Ag                                                                                                             | 0         | $\frac{1}{4}$ | $\frac{5}{8}$ | 0.0205(5)                       |
| $\chi^2 = 2.31$                | Re                                                                                                             | 0         | $\frac{1}{4}$ | $\frac{1}{8}$ | 0.0094(3)                       |
| $R_p$ 0.0609 $R_{wp}$ 0.0486   | O                                                                                                              | 0.1312(2) | 0.0195(2)     | 0.2080(1)     | 0.0196(3)                       |
| <b>KReO<sub>4</sub></b>        | $a = 5.67625(8) \text{ c} = 12.6994(4) \text{ \AA} \text{ Vol} = 409.17(1) \text{ \AA}^3$                      |           |               |               |                                 |
| $I4_1/a$ (No. 88)              | K                                                                                                              | 0         | $\frac{1}{4}$ | $\frac{5}{8}$ | 0.0201(8)                       |
| $\chi^2 = 2.36$                | Re                                                                                                             | 0         | $\frac{1}{4}$ | $\frac{1}{8}$ | 0.0124(3)                       |
| $R_p$ 0.0635 $R_{wp}$ 0.0502   | O                                                                                                              | 0.1162(3) | 0.0296(2)     | 0.2026(1)     | 0.0250(3)                       |
| <b>TlReO<sub>4</sub> 50 K</b>  | $a = 5.78654(9) \text{ c} = 12.8718(3) \text{ \AA} \text{ Vol} = 431.00(2) \text{ \AA}^3$                      |           |               |               |                                 |
| $I4_1/a$ (No. 88)              | Tl                                                                                                             | 0         | $\frac{1}{4}$ | $\frac{5}{8}$ | 0.0048(3)                       |
| $\chi^2 = 2.70$                | Re                                                                                                             | 0         | $\frac{1}{4}$ | $\frac{1}{8}$ | 0.0026(4)                       |
| $R_p$ 0.0609 $R_{wp}$ 0.0486   | O                                                                                                              | 0.1192(3) | 0.0355(3)     | 0.2013(1)     | 0.0100(3)                       |
| <b>TlReO<sub>4</sub> 450 K</b> | $a = 5.7710(3) \text{ c} = 13.4041(3) \text{ \AA} \text{ Vol} = 447.34(5) \text{ \AA}^3$                       |           |               |               |                                 |
| $I4_1/a$ (No. 88)              | Tl                                                                                                             | 0         | $\frac{1}{4}$ | $\frac{5}{8}$ | 0.0453(12)                      |
| $\chi^2 = 2.51$                | Re                                                                                                             | 0         | $\frac{1}{4}$ | $\frac{1}{8}$ | 0.0330(11)                      |
| $R_p$ 0.0525 $R_{wp}$ 0.0417   | O                                                                                                              | 0.0875(6) | 0.0251(6)     | 0.1981(3)     | 0.0779(11)                      |
| <b>RbReO<sub>4</sub></b>       | $a = 5.8329(1) \text{ c} = 13.2543(3) \text{ \AA} \text{ Vol} = 450.94(2) \text{ \AA}^3$                       |           |               |               |                                 |
| $I4_1/a$ (No. 88)              | Rb                                                                                                             | 0         | $\frac{1}{4}$ | $\frac{5}{8}$ | 0.0225(6)                       |
| $\chi^2 = 2.51$                | Re                                                                                                             | 0         | $\frac{1}{4}$ | $\frac{1}{8}$ | 0.0182(5)                       |
| $R_p$ 0.0544 $R_{wp}$ 0.0423   | O                                                                                                              | 0.1048(3) | 0.0329(3)     | 0.1992(2)     | 0.0337(4)                       |
| <b>CsReO<sub>4</sub></b>       | $a = 5.7476(3) \text{ b} = 5.9881(3) \text{ c} = 14.2928(7) \text{ \AA} \text{ Vol} = 491.91(5) \text{ \AA}^3$ |           |               |               |                                 |
| $Pnma$ (No. 62)                | Cs                                                                                                             | 0.0230(9) | $\frac{3}{4}$ | 0.1276(4)     | 0.0276(12)                      |
| $\chi^2 = 2.02$                | Re                                                                                                             | 0.0392(5) | $\frac{1}{4}$ | 0.3800(2)     | 0.0196(7)                       |
| $R_p$ 0.0547 $R_{wp}$ 0.0433   | O1                                                                                                             | 0.822(1)  | $\frac{1}{4}$ | 0.0830(3)     | 0.0355(13)                      |
|                                | O2                                                                                                             | 0.8552(9) | $\frac{1}{4}$ | 0.4752(4)     | 0.0640(19)                      |
|                                | O3                                                                                                             | 0.0105(9) | 0.5153(6)     | 0.6857(2)     | 0.0498(12)                      |

Table S2: Atomic coordinates and ADPs derived from Rietveld refinements against neutron diffraction data collected at room temperature on TlReO<sub>4</sub> oxide.

$$a = 17.4071(8) \text{ \AA} \quad b = 13.3329(5) \text{ \AA} \quad c = 5.62872(28) \text{ \AA} \quad \beta = 90.156(5)^\circ \quad \text{Vol} = 1306.34(10) \text{ \AA}^3$$

| Name | x          | y          | z           | U <sub>i</sub> *100 Å <sup>2</sup> |
|------|------------|------------|-------------|------------------------------------|
| Tl1  | 0.0820(11) | 0.3747(10) | 0.4814(24)  | 2.54(24)                           |
| Tl2  | 0.2450(10) | 0.6349(10) | 0.4811(23)  | 2.92(38)                           |
| Tl3  | 0.4104(10) | 0.3767(10) | 0.4962(25)  | 2.51(33)                           |
| Re1  | 0.2492(8)  | 0.3792(12) | -0.0194(24) | 2.77(38)                           |
| Re2  | 0.4181(9)  | 0.6269(8)  | 0.0041(20)  | 1.42(24)                           |
| Re3  | 0.0845(9)  | 0.6157(9)  | 0.0317(17)  | 1.67(26)                           |
| O11  | 0.2769(12) | 0.4571(15) | -0.2414(39) | 3.66(55)                           |
| O12  | 0.2095(12) | 0.4433(14) | 0.2268(34)  | 2.52(47)                           |
| O13  | 0.1866(12) | 0.2921(15) | -0.1226(32) | 3.00(49)                           |
| O14  | 0.3262(15) | 0.3045(21) | 0.0610(50)  | 5.11(73)                           |
| O21  | 0.3803(12) | 0.5515(16) | 0.2114(44)  | 3.76(58)                           |
| O22  | 0.4579(18) | 0.5525(26) | -0.2091(67) | 9.03(120)                          |
| O23  | 0.4866(14) | 0.6991(24) | 0.1190(42)  | 3.58(56)                           |
| O24  | 0.3448(14) | 0.6980(21) | -0.1330(45) | 3.94(61)                           |
| O31  | 0.1704(11) | 0.6678(14) | -0.0132(34) | 3.62(49)                           |
| O32  | 0.0031(11) | 0.6915(13) | -0.0513(32) | 1.59(38)                           |
| O33  | 0.0752(10) | 0.5807(11) | 0.3215(26)  | 2.32(30)                           |
| O34  | 0.0802(14) | 0.5078(11) | -0.1322(25) | 3.58(38)                           |

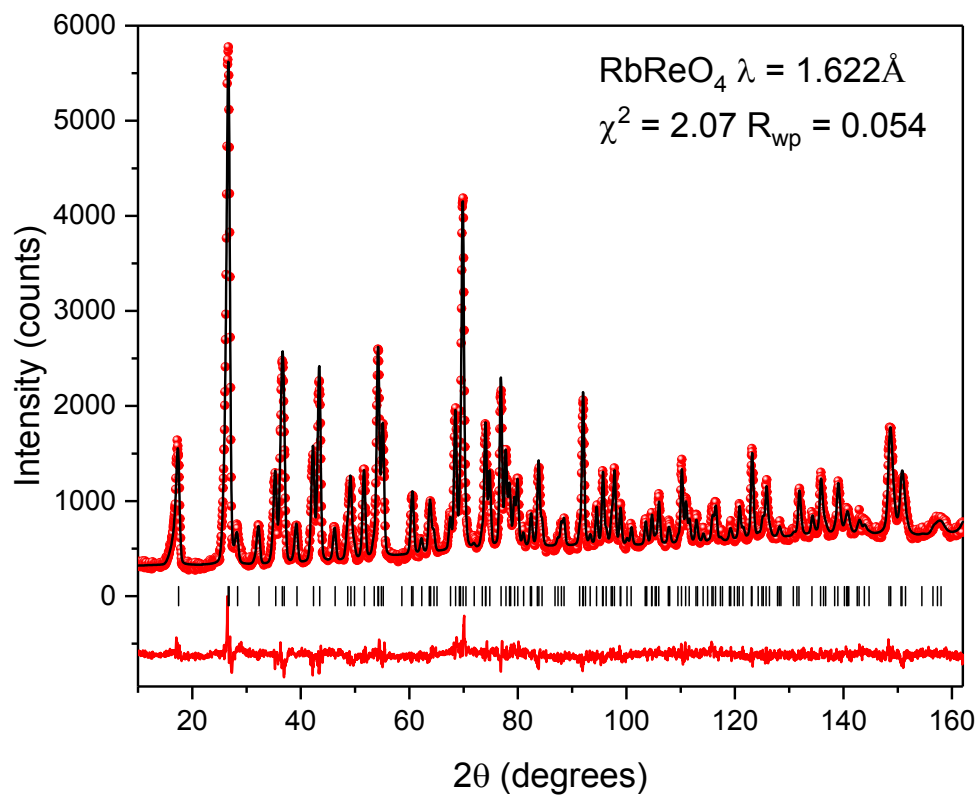

Figure S1(a). Observed (red symbols) calculated (black line) and difference (red line) neutron diffraction profiles for RbReO<sub>4</sub> measured at room temperature and fitted in space group  $I4_1/a$ . The short vertical lines show the positions of the space group allowed Bragg reflections.



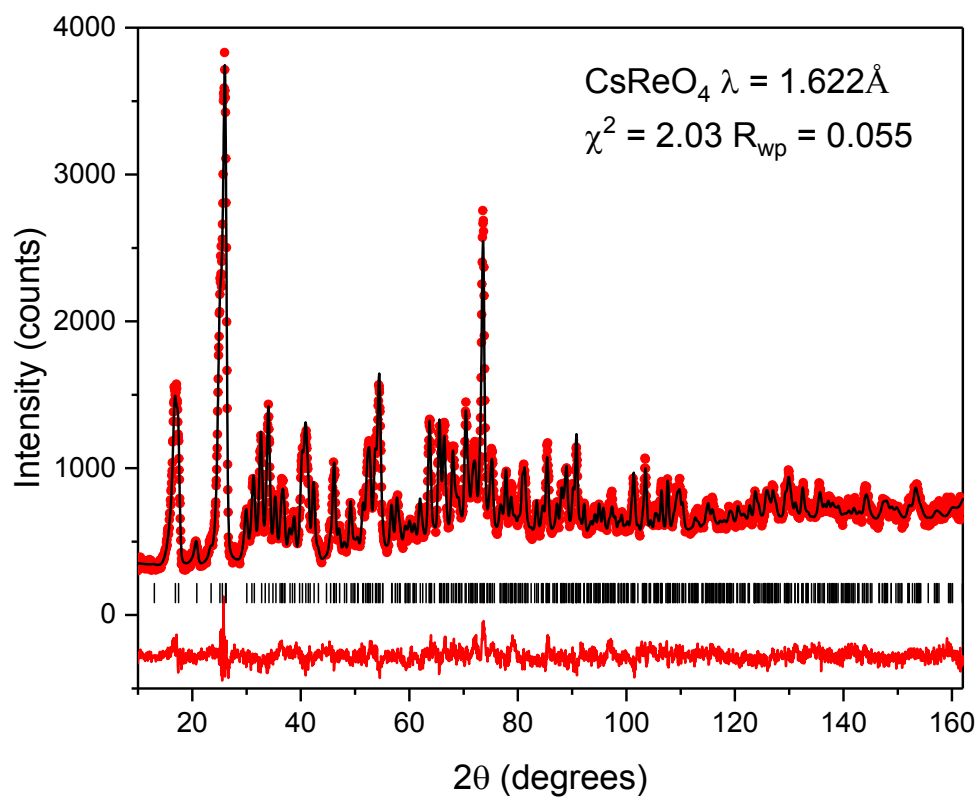

Figure S1(b). Observed (red symbols) calculated (black line) and difference (red line) neutron diffraction profiles for CsReO<sub>4</sub> measured at room temperature and fitted in space group *Pnma*. The short vertical lines show the positions of the space group allowed Bragg reflections.

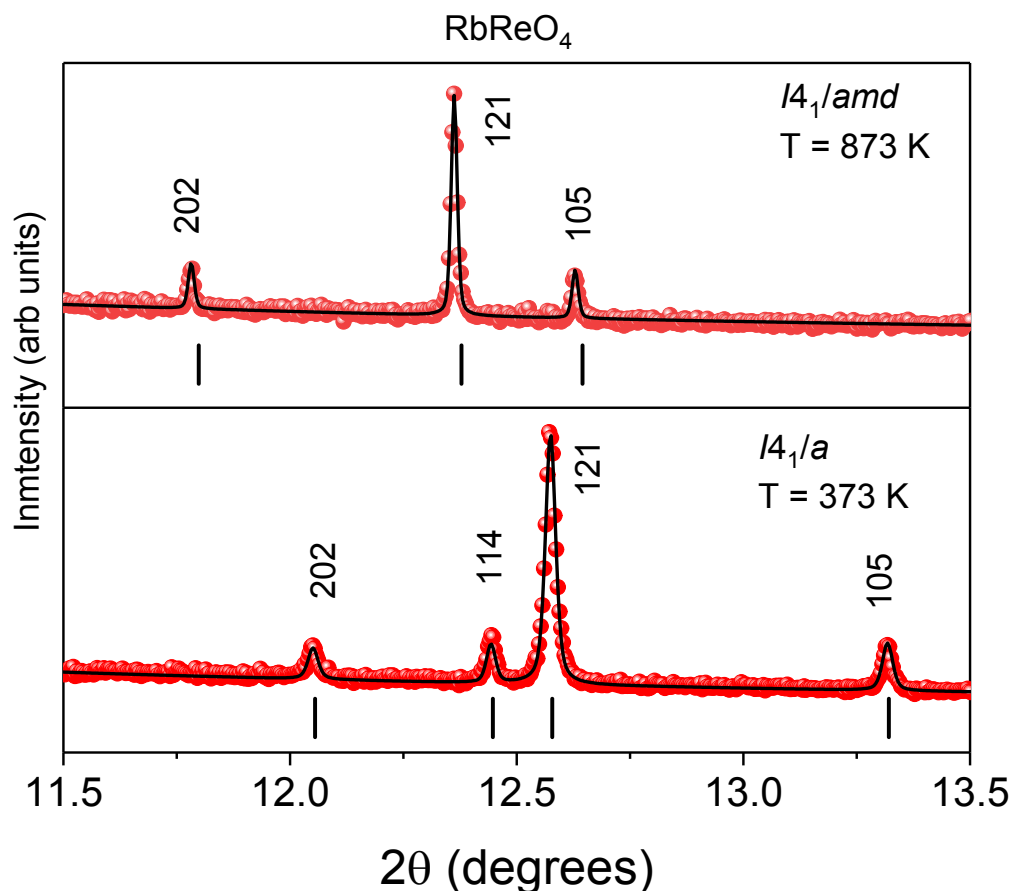

Figure S2 Portions of the SXRD profiles for RbReO<sub>4</sub> illustrating the loss of the (114) reflection indicative of the transition from *I*4<sub>1</sub>/*a* to *I*4<sub>1</sub>/*amd*.

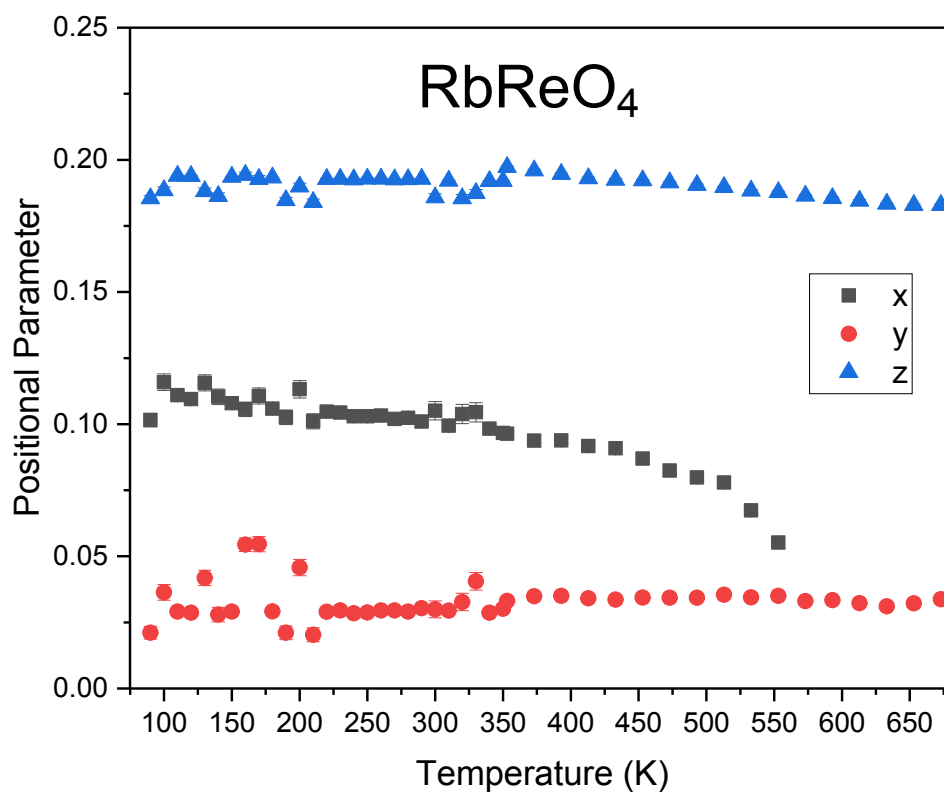

Figure S3. Temperature dependence of the refined oxygen positional parameters for  $\text{ReReO}_4$  established by Rietveld refinement against synchrotron X-ray diffraction data. The x value is required to be zero in space group  $I4_1/amd$ .

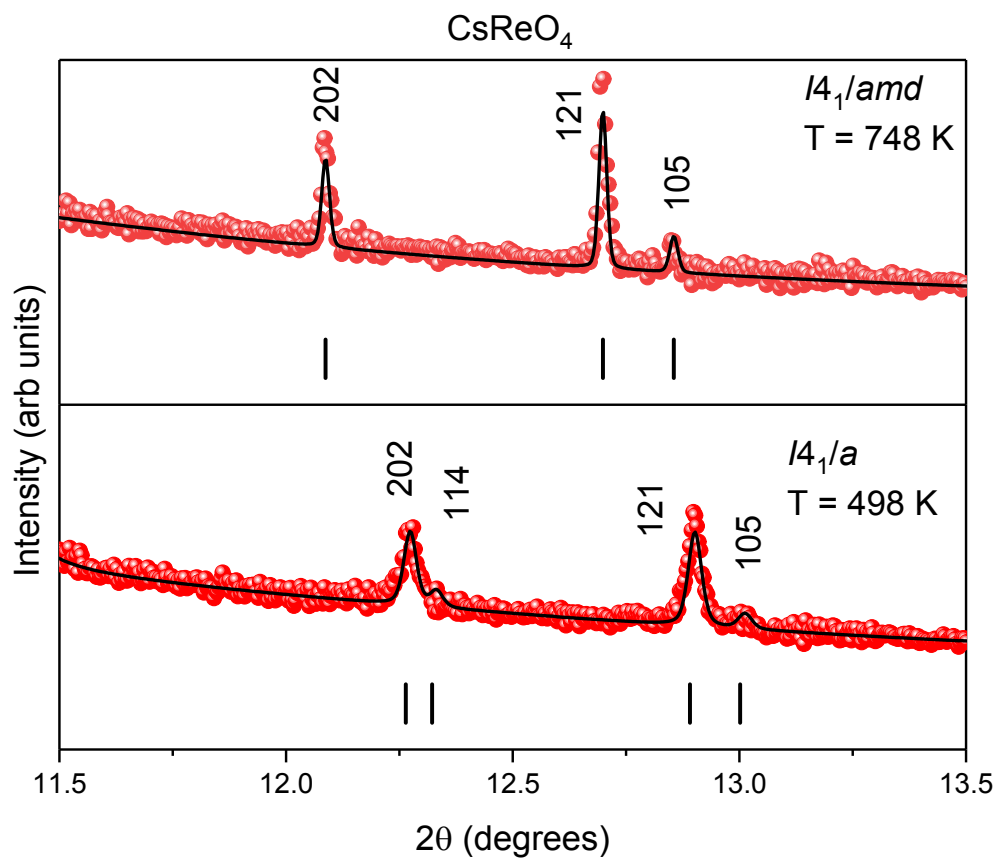

Figure S4 Portions of the SXR D profiles for CsReO<sub>4</sub> illustrating the loss of the (114) reflection indicative of the transition from *I*4<sub>1</sub>/*a* to *I*4<sub>1</sub>/*amd*.

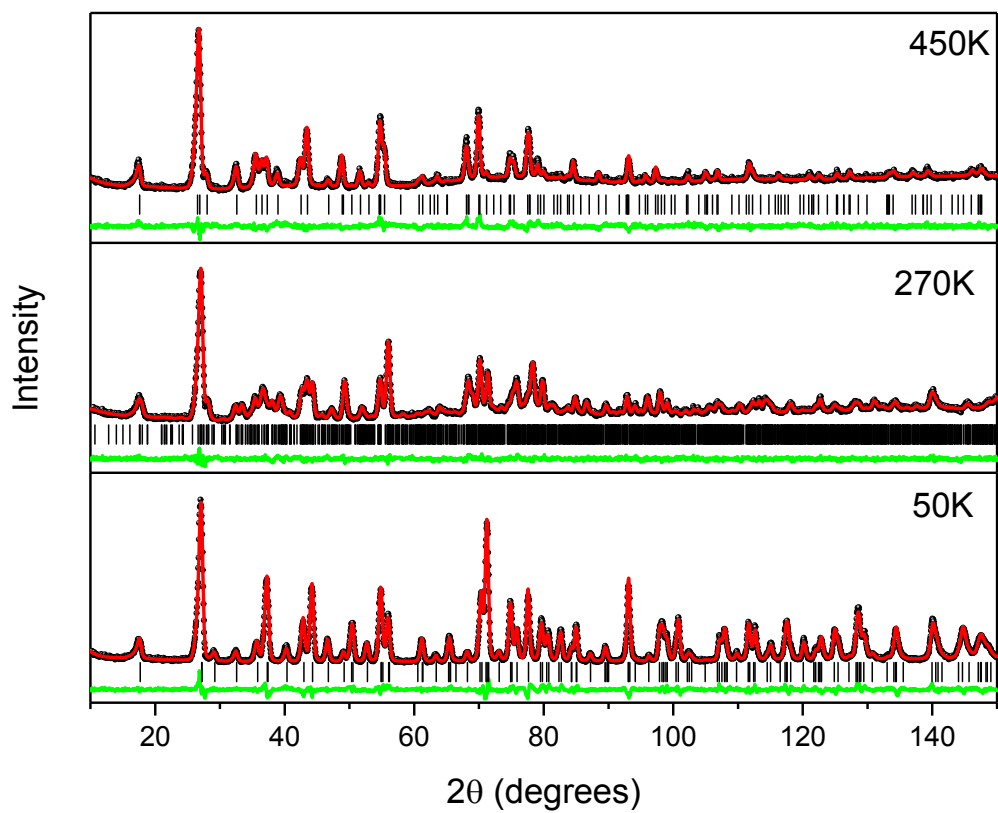

Figure S5 Rietveld fits for  $\text{TlReO}_4$  at selected temperatures.

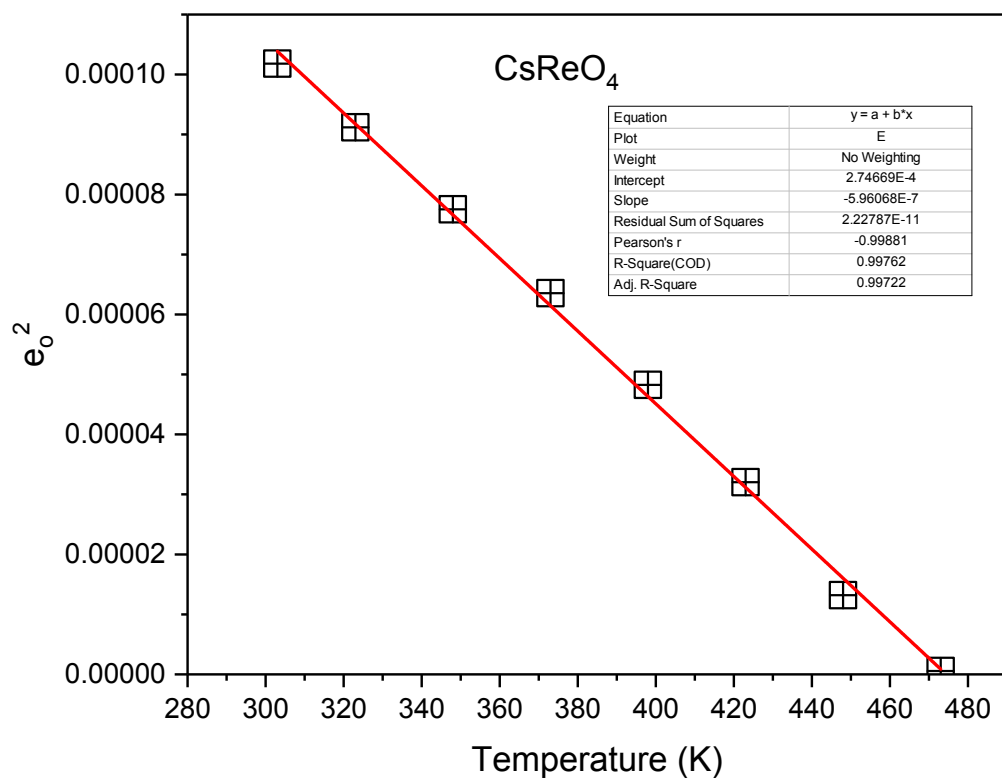

Figure S6. Temperature dependence of the square of the spontaneous strain for CsReO<sub>4</sub> showing the continuous transition to be second order.
